# Supplementary material for: Morphologically and Functionally Distinct Lipid Droplet Subpopulations
Source: PubMed Central journal article supplement (PMC4937419; doi:10.1038/srep29539), 2016-07-08
Supplement: srep29539-s1.pdf [file srep29539-s1.pdf]

**Supplemental Information for**

**Morphologically and Functionally Distinct Lipid Droplet Subpopulations**

Shuyan Zhang<sup>a§</sup>, Yang Wang<sup>a§</sup>, Liujuan Cui<sup>a,b</sup>, Yaqin Deng<sup>a,c</sup>, Shimeng Xu<sup>a,c</sup>, Jinhai

Yu<sup>a,c</sup>, Simon Cichello<sup>d</sup>, Ginette Serrero<sup>e</sup>, Yunshu Ying<sup>f</sup>, and Pingsheng Liu<sup>a\*</sup>

## **Materials and Methods**

### **Mass spectrometry (MS) analysis of lipid droplet proteins from CHO K2 Cells**

LD proteins were dissolved at a concentration of 10 mg/ml in 100 mM Tris (pH 7.8), containing 8 M urea. The proteins were then reduced with 10 mM DTT for 1 h at RT. 40 mM iodoacetamide was added to alkylate the protein mixture for 1 h at RT in the dark. 40 mM DTT was used to consume the unreacted iodoacetamide for 1 h at RT. Then the urea concentration was reduced to less than 2 M with super clean water. Trypsin was then added at an enzyme:substrate ratio of 1:50 (w/w) and the reaction mixture was incubated overnight in 37 °C water bath. 10% formic acid was added to stop the reaction, making pH less than 4. The resulting peptide solution was then subjected to nano-LC-ESI-LTQ MS/MS analysis according to the protocol previously described<sup>1</sup>. Briefly, a C<sub>18</sub> trap column was used and the mass spectrometer was operated in data-dependent mode and set at an initial 400-2000 *m/z* scan range, followed by five MS/MS scans. The MS/MS data were searched against the NCBI Refseq mouse database that was released on Jan. 3, 2011. BioWorks search parameters were set as follows: enzyme, trypsin; precursor mass tolerance, 3 Da; fragment ion mass tolerance, 1 Da. The fixed modification was set for carboxyamidomethylation of cysteine (Cys +57.02 Da). The search results were filtered as follows: Xcorr (+1) ≥ 1.5, Xcorr (+2) ≥ 2.0, Xcorr (+3) ≥ 2.5; Delta CN ≥ 0.08; Sp score ≥ 500; RSp ≤ 5; Number of distinct peptides ≥ 2.

**Supplemental Table 1. Proteins in various LD subpopulations from CHO K2 cells identified by MS.**

| Sub-cellular location/Function | Proteins                                                    | Aliases/Short name | Peptide number in LD Fractions |    |    | GI No.    |
|--------------------------------|-------------------------------------------------------------|--------------------|--------------------------------|----|----|-----------|
|                                |                                                             |                    | 1                              | 2  | 3  |           |
| <b>Perilipin family</b>        | perilipin-2                                                 | ADRP               | 7                              | 7  | 7  | 116235489 |
| <b>Lipid metabolism</b>        | long-chain-fatty-acid--CoA ligase 4                         | LACS 4             | 45                             | 52 | 40 | 341940183 |
|                                | long-chain-fatty-acid--CoA ligase 3                         | LACS 3             | 31                             | 31 | 29 | 341940182 |
|                                | patatin-like phospholipase domain-containing protein 2      | ATGL               | 14                             | 10 | 12 | 81896337  |
|                                | comparative gene identification-58                          | CGI-58             | 6                              | 10 | 8  | 13385690  |
|                                | lysophospholipid acyltransferase LPCAT4                     | 1-AGPAT 7          | 6                              | 9  | 7  | 46402175  |
|                                | squalene monooxygenase                                      | SE                 | 5                              | 3  | 3  | 6678127   |
|                                | NADH-cytochrome b5 reductase 3                              | B5R                | 8                              | 9  | 7  | 19745150  |
|                                | retinol dehydrogenase 10                                    | Rdh10              | 4                              | 4  | 3  | 25141231  |
|                                | saccharopine dehydrogenase-like oxidoreductase              | CGI-49             | 7                              | 6  | 6  | 73919295  |
|                                | estradiol 17-beta-dehydrogenase 11                          | 17bHSD11           | 5                              | 7  | 6  | 16716597  |
|                                | sterol-4-alpha-carboxylate 3-dehydrogenase, decarboxylating | NSDHL              | 4                              | 2  | 2  | 31982437  |
|                                | glycerol-3-phosphate acyltransferase 6 precursor            | GPAT6              | 2                              | 7  | 6  | 30520301  |
|                                | acetyl-CoA carboxylase 1                                    | ACC1               | 2                              | 2  | 3  | 125656173 |
|                                | lanosterol synthase                                         | OSC                | 2                              | 3  | 4  | 22122469  |
|                                | hormone-sensitive lipase                                    | HSL                | 3                              | 0  | 3  | 85690846  |
|                                | dehydrogenase/reductase SDR family member 1                 | DHRS1              | 4                              | 0  | 4  | 31980844  |
|                                | short-chain dehydrogenase/reductase 3                       | retSDR1            | 2                              | 0  | 0  | 47115587  |

|                                                                          |              |    |    |    |           |
|--------------------------------------------------------------------------|--------------|----|----|----|-----------|
| glycerol-3-phosphate acyltransferase 3                                   | GPAT3        | 2  | 0  | 0  | 27370046  |
| long-chain-fatty-acid--CoA ligase 1                                      | LACS 1       | 0  | 2  | 0  | 31560705  |
| 3-keto-steroid reductase                                                 | 17bHSD7      | 0  | 0  | 2  | 87162470  |
| <b>ER</b>                                                                |              |    |    |    |           |
| transitional endoplasmic reticulum ATPase                                | VCP          | 19 | 15 | 12 | 225543319 |
| 78 kDa glucose-regulated protein                                         | Bip          | 19 | 12 | 9  | 2506545   |
| protein disulfide-isomerase A3 precursor                                 | ERp60        | 5  | 6  | 2  | 112293264 |
| sarcoplasmic/endoplasmic reticulum calcium ATPase 2                      | SERCA2       | 6  | 2  | 3  | 12643614  |
| leucine-rich repeat-containing protein 59                                | LRC59        | 5  | 3  | 3  | 19527026  |
| ancient ubiquitous protein 1                                             | AUP1         | 4  | 5  | 2  | 90403601  |
| nogo-B receptor precursor                                                | NgBR         | 2  | 4  | 3  | 13384840  |
| endoplasmin precursor                                                    | GRP-94       | 8  | 8  | 0  | 6755863   |
| cytoskeleton-associated protein 4                                        | Climp-63     | 5  | 2  | 0  | 62526118  |
| dolichyl-phosphate beta-glucosyltransferase                              | ALG5         | 3  | 3  | 0  | 21728372  |
| serpin H1 precursor                                                      | serpin H1    | 2  | 2  | 0  | 161353502 |
| protein disulfide-isomerase A6 precursor                                 | ERp5         | 4  | 0  | 2  | 58037267  |
| protein disulfide-isomerase precursor                                    | PDI          | 4  | 0  | 0  | 42415475  |
| dolichyl-diphosphooligosaccharide--protein glycosyltransferase subunit 2 | RPN-II       | 3  | 0  | 0  | 34996495  |
| hypoxia up-regulated protein 1 precursor                                 | GRP-170      | 2  | 0  | 0  | 157951706 |
| membrane-associated progesterone receptor component 1                    | mPR          | 2  | 0  | 0  | 31980806  |
| calreticulin precursor                                                   | CRP55        | 0  | 2  | 0  | 6680836   |
| <b>Mitochondria</b>                                                      |              |    |    |    |           |
| ATP synthase subunit alpha, mitochondrial precursor                      | ATPsyn-alpha | 16 | 5  | 5  | 6680748   |

|                                                                |              |    |   |   |           |
|----------------------------------------------------------------|--------------|----|---|---|-----------|
| ATP synthase subunit beta, mitochondrial precursor             | ATPsyn-beta  | 12 | 6 | 7 | 31980648  |
| ADP/ATP translocase 2                                          | Ant2         | 5  | 6 | 4 | 22094075  |
| prohibitin                                                     | prohibitin   | 3  | 3 | 3 | 6679299   |
| phosphate carrier protein, mitochondrial precursor             | PTP          | 2  | 2 | 2 | 19526818  |
| prohibitin-2                                                   | prohibitin-2 | 4  | 2 | 0 | 126723336 |
| sideroflexin-1                                                 | TCC          | 2  | 2 | 0 | 15147224  |
| 60 kDa heat shock protein, mitochondrial                       | HSP60        | 3  | 0 | 0 | 183396771 |
| stAR-related lipid transfer protein 7, mitochondrial precursor | StARD7       | 2  | 0 | 0 | 151301231 |
| protein NipSnap homolog 1                                      | NipSnap1     | 2  | 0 | 0 | 6679066   |

### Membrane trafficking

|         |         |    |    |    |           |
|---------|---------|----|----|----|-----------|
| Rab-18  | Rab 18  | 13 | 11 | 11 | 30841008  |
| Rab-14  | Rab 14  | 10 | 11 | 12 | 18390323  |
| Rab-7a  | Rab 7a  | 8  | 11 | 12 | 148747526 |
| Rab-1B  | Rab 1b  | 8  | 11 | 12 | 21313162  |
| Rab-1A  | Rab 1a  | 5  | 11 | 8  | 6679587   |
| Rab-2A  | Rab 2a  | 7  | 8  | 7  | 10946940  |
| Rab-5C  | Rab 5   | 6  | 4  | 7  | 113866024 |
| Rab-5B  |         | 2  | 2  | 0  | 48474314  |
| Rab-31  | Rab-22B | 6  | 5  | 4  | 225579124 |
| Rab-10  | Rab 10  | 4  | 4  | 4  | 7710086   |
| Rab-6   | Rab 6   | 3  | 2  | 2  | 13638404  |
| Rab-35  | Rab 35  | 2  | 2  | 2  | 37718983  |
| Rab-11B | Rab 11b | 4  | 4  | 0  | 6679583   |
| Rab-33B | Rab 33b | 2  | 2  | 0  | 8394133   |
| Rab-11A | Rab 11a | 4  | 0  | 8  | 31980840  |

|                                                            |                              |   |   |   |           |
|------------------------------------------------------------|------------------------------|---|---|---|-----------|
| Rab-8A                                                     | Rab 8a                       | 3 | 0 | 3 | 38372905  |
| Rab-8B                                                     |                              | 2 | 0 | 0 | 27734154  |
| Rab-3D                                                     |                              | 0 | 2 | 2 | 15042957  |
| Rab-4A                                                     | Rab 21                       | 2 | 0 | 0 | 171184402 |
| Rab-21                                                     |                              | 2 | 0 | 0 | 33859751  |
| Rab-7L1                                                    | Rab-7-like protein 1         | 0 | 2 | 0 | 229608951 |
| Rab-34                                                     | Rab 34                       | 0 | 0 | 3 | 20141805  |
| Rab-22A                                                    |                              | 0 | 0 | 3 | 148747177 |
| Rab-32                                                     |                              | 0 | 0 | 2 | 13385896  |
| synaptic vesicle membrane protein VAT-1 homolog            |                              | 6 | 8 | 9 | 33859662  |
| ras-related protein Ral-A precursor                        | RalA                         | 3 | 4 | 4 | 34328471  |
| ras-related protein Rap-1b precursor                       | GTP-binding protein smg p21B | 6 | 7 | 4 | 33859753  |
| transmembrane emp24 domain-containing protein 10 precursor | S31I125                      | 2 | 3 | 3 | 21312062  |
| coatamer subunit beta                                      | Beta-COP                     | 3 | 2 | 0 | 15426055  |
| charged multivesicular body protein 6                      | Vps20                        | 0 | 2 | 2 | 147904547 |
| GTPase NRas precursor                                      | Transforming protein N-Ras   | 0 | 2 | 0 | 111154109 |
| ras-related protein Ral-B precursor                        |                              | 0 | 0 | 4 | 11612509  |

## Ribosome

|                            |  |   |   |   |          |
|----------------------------|--|---|---|---|----------|
| 60S ribosomal protein L4   |  | 4 | 3 | 2 | 30794450 |
| 60S ribosomal protein L7a  |  | 3 | 2 | 2 | 7305443  |
| 60S ribosomal protein L27a |  | 2 | 2 | 2 | 31560517 |
| 60S ribosomal protein L21  |  | 2 | 2 | 3 | 2500367  |
| 60S ribosomal protein L10  |  | 3 | 3 | 0 | 16418339 |
| 40S ribosomal protein S3   |  | 0 | 2 | 2 | 6755372  |

|                                           |   |   |   |           |
|-------------------------------------------|---|---|---|-----------|
| 60S acidic ribosomal protein P0           | 2 | 0 | 0 | 6671569   |
| 60S ribosomal protein L18                 | 2 | 0 | 0 | 83699424  |
| 40S ribosomal protein S13                 | 2 | 0 | 0 | 13386034  |
| 60S ribosomal protein L24                 | 2 | 0 | 0 | 18250296  |
| 60S ribosomal protein L30                 | 0 | 3 | 0 | 6677783   |
| 40S ribosomal protein S8                  | 0 | 2 | 0 | 6677813   |
| 60S ribosomal protein L7                  | 0 | 2 | 0 | 31981515  |
| 40S ribosomal protein S2                  | 0 | 2 | 0 | 46397787  |
| 60S ribosomal protein L23a                | 0 | 2 | 0 | 51338638  |
| PREDICTED: 40S ribosomal protein SA-like  | 0 | 2 | 0 | 309264022 |
| PREDICTED: 40S ribosomal protein S8-like  | 0 | 2 | 0 | 309266495 |
| PREDICTED: 60S ribosomal protein L7a-like | 0 | 2 | 0 | 82950040  |
| 60S ribosomal protein L8                  | 0 | 0 | 2 | 6755358   |
| 60S ribosomal protein L5                  | 0 | 0 | 2 | 23956082  |
| PREDICTED: 60S ribosomal protein L5-like  | 0 | 0 | 2 | 309267832 |

## Nuclear proteins

|                                   |    |   |   |              |
|-----------------------------------|----|---|---|--------------|
| histone H4                        | 11 | 8 | 7 | 51317340     |
| lamin-B1                          | 7  | 7 | 9 | 188219589    |
| histone H2A                       | 4  | 4 | 5 | 30061357     |
| transmembrane protein 43          | 4  | 3 | 4 | 21311891     |
| histone H2B                       | 3  | 5 | 5 | 160420310    |
| histone H1.3                      | 3  | 3 | 2 | 254588110    |
| histone H3.3                      | 2  | 0 | 2 | 55977063     |
| prelamin-A/C                      | 3  | 3 | 0 | 85700428     |
| heat shock cognate 71 kDa protein | 0  | 2 | 0 | 31981690     |
|                                   |    |   |   | Protein LUMA |
|                                   |    |   |   | 70 kDa lamin |

|                                                        |  |   |   |   |           |
|--------------------------------------------------------|--|---|---|---|-----------|
| thymocyte nuclear protein 1                            |  | 0 | 2 | 0 | 21362343  |
| transformation/transcription domain-associated protein |  | 0 | 0 | 2 | 124486949 |

### Cytoskeleton

|                        |        |    |    |    |          |
|------------------------|--------|----|----|----|----------|
| vimentin               |        | 9  | 12 | 12 | 31982755 |
| annexin A2             | PAP-IV | 3  | 2  | 3  | 6996913  |
| actin                  |        | 6  | 7  | 4  | 6752954  |
| tubulin beta-5 chain   |        | 12 | 7  | 7  | 7106439  |
| tubulin alpha-1B chain |        | 3  | 0  | 0  | 34740335 |
| tubulin beta-4 chain   |        | 0  | 0  | 4  | 31981939 |
| tubulin beta-2A chain  |        | 0  | 0  | 4  | 33859488 |
| desmin                 |        | 0  | 2  | 0  | 33563250 |

### Cytosolic proteins

|                                 |              |   |   |   |           |
|---------------------------------|--------------|---|---|---|-----------|
| heat shock protein HSP 90-beta  |              | 4 | 0 | 0 | 40556608  |
| heat shock protein HSP 90-alpha |              | 2 | 0 | 0 | 6754254   |
| elongation factor 1-alpha 1     | EF-1-alpha-1 | 3 | 4 | 5 | 126032329 |
| polyadenylate-binding protein 1 |              | 2 | 0 | 0 | 31560656  |

### Protein degradation

|                                                |        |    |    |    |           |
|------------------------------------------------|--------|----|----|----|-----------|
| FAS-associated factor 2                        | UBXD8  | 12 | 12 | 13 | 158533976 |
| UBX domain-containing protein 4                |        | 3  | 5  | 5  | 85861252  |
| ubiquitin-conjugating enzyme E2 G2             |        | 2  | 3  | 2  | 20806111  |
| ubiquitin conjugation factor E4 A              | UBE4A  | 2  | 2  | 0  | 167736371 |
| ubiquitin-40S ribosomal protein S27a precursor | RPS27A | 0  | 2  | 2  | 13195690  |



**Signal transduction**

|                                                                  |                  |   |   |   |          |
|------------------------------------------------------------------|------------------|---|---|---|----------|
| tumor protein D54                                                | hD54, D52-like 2 | 6 | 6 | 8 | 31560247 |
| calcium-binding protein p22                                      |                  | 4 | 2 | 5 | 9790225  |
| guanine nucleotide-binding protein G(I)/G(S)/G(T) subunit beta-2 |                  | 3 | 3 | 2 | 13937391 |
| methyltransferase-like protein 7A                                | AAM-B            | 2 | 3 | 3 | 33563290 |
| transforming protein RhoA precursor                              | Rho A            | 2 | 3 | 3 | 31542143 |
| rho-related GTP-binding protein RhoG precursor                   | Rho G            | 2 | 3 | 0 | 9625037  |
| cell division control protein 42 homolog isoform 1 precursor     |                  | 0 | 3 | 0 | 6753364  |

**Other**

|                                                 |                       |   |   |   |           |
|-------------------------------------------------|-----------------------|---|---|---|-----------|
| tumor protein p63-regulated gene 1-like protein |                       | 3 | 3 | 5 | 21312776  |
| vacuolar protein sorting-associated protein 13C |                       | 4 | 3 | 0 | 122114537 |
| uncharacterized protein LOC239673               |                       | 2 | 0 | 3 | 269914154 |
| polymerase I and transcript release factor      | Cavin-1/PTRF          | 0 | 2 | 0 | 6679567   |
| aladin                                          | Aladin/Adracalin/AAAS | 0 | 0 | 2 | 241982696 |

---

**Supplemental Figure 1 Interaction between lipid droplets and other organelles in mouse liver.**

Fractions 2 and 3 from mouse liver were isolated as described in the Materials and Methods. They were mixed first and then distributed into 6 aliquots. The isolated LDs were treated with trypsin at 37 °C for 60 min at the concentration (% , w/v) indicated. After incubation, LDs were re-isolated, and proteins were extracted and analyzed by silver staining and Western blotting with the indicated antibodies.

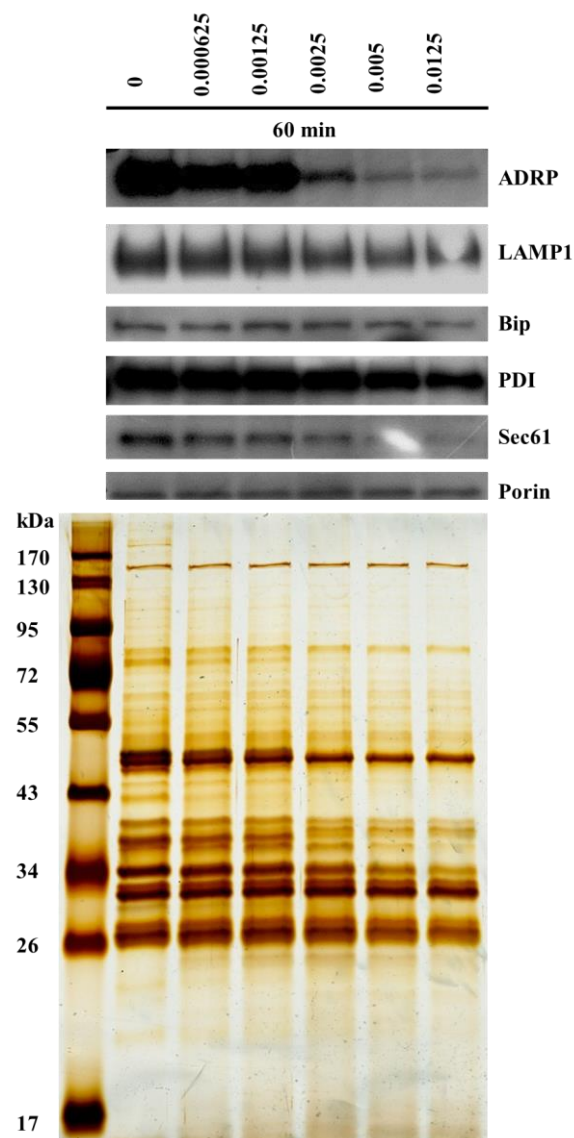

**Supplemental Figure 2 Cross correlation analysis of proteins in different LD subpopulations from CHO K2.**

Proteins from different LD fractions in CHO K2 cells were subjected to MS analysis respectively as described in the Materials and Methods. Proteins identified in MS of LD Fraction 1 (red), Fraction 2 (blue) and Fraction 3 (yellow) were analyzed with Venn Diagram. Numbers represent the amount of proteins belonging to the corresponding data sets.

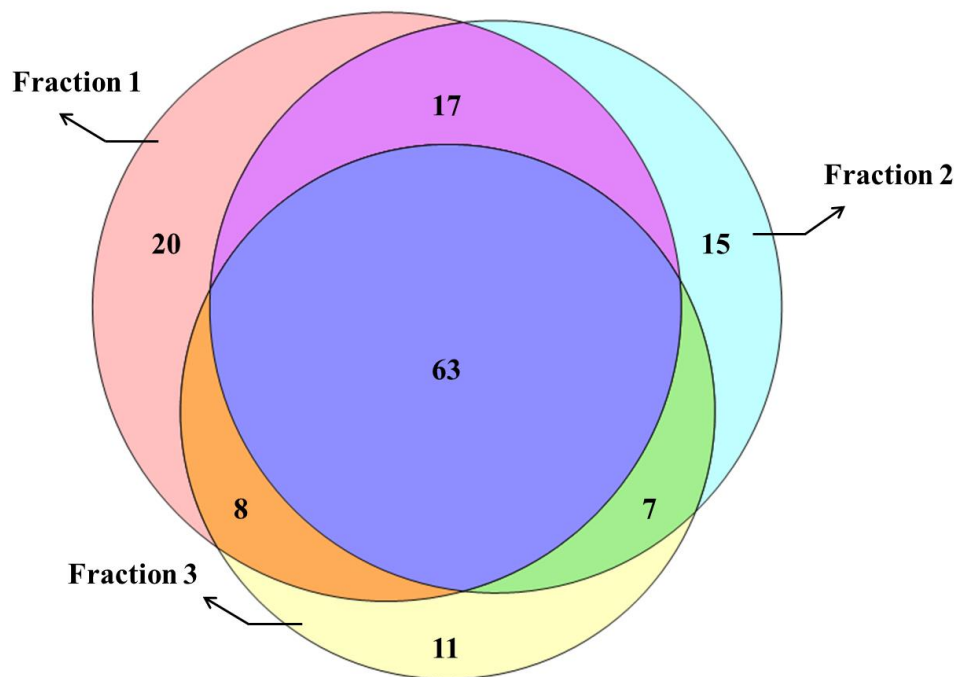

**Supplemental Figure 3 Peptide numbers of proteins in LD subpopulations from CHO K2 cells.**

The proteins identified were grouped according to their sub-cellular location or function as follows (A) lipid metabolism proteins, (B) ER proteins, (C) mitochondrial proteins and (D) Rab proteins. Peptide numbers of a specified protein from Fraction 1 (blue), Fraction 2 (red) and Fraction 3 (green) were counted respectively.

NSDHL, sterol-4-alpha-carboxylate 3-dehydrogenase (decarboxylating); DHRS1, dehydrogenase/reductase SDR family member 1; LRRC59, leucine-rich repeat-containing protein 59; AUP1, ancient ubiquitous protein 1; ALG5, dolichyl-phosphate beta-glucosyltransferase; StARD7, stAR-related lipid transfer protein 7.

**A**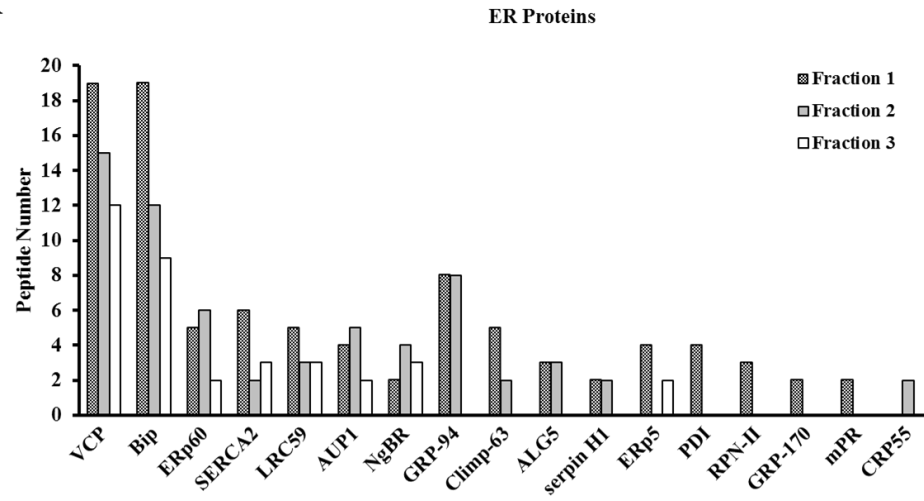**B**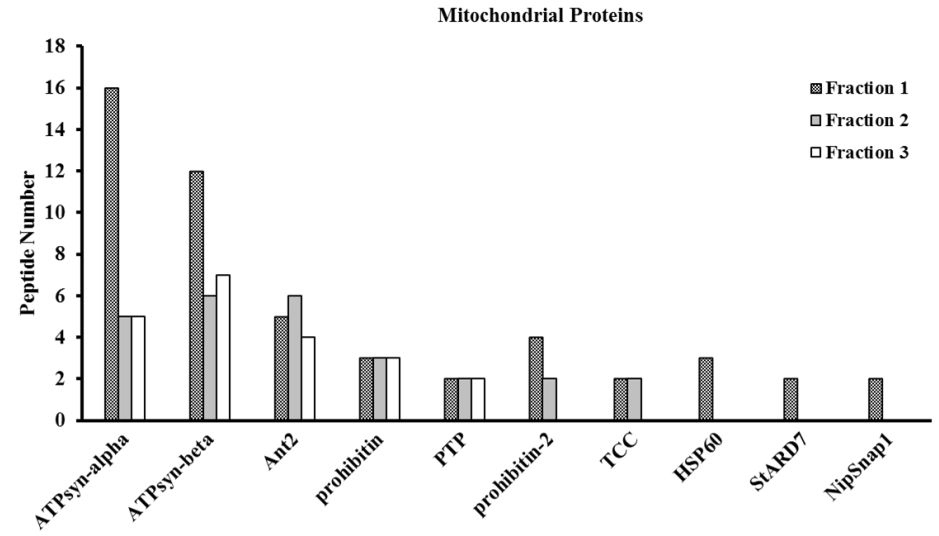**C**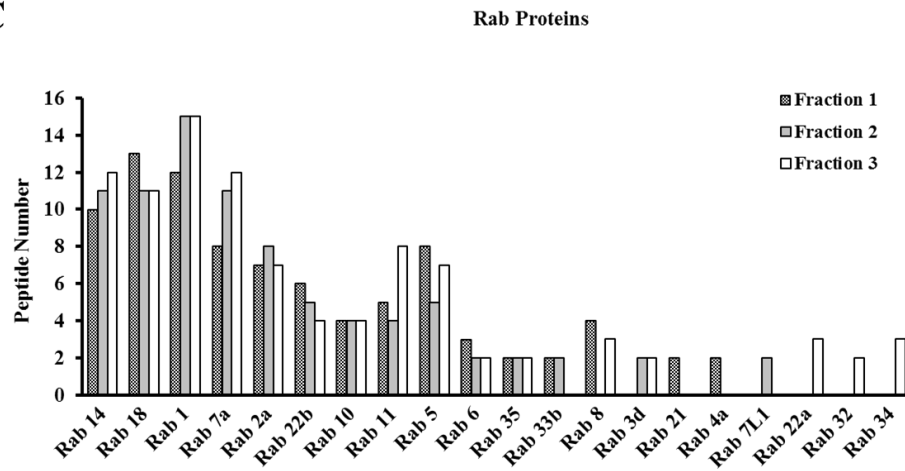**D**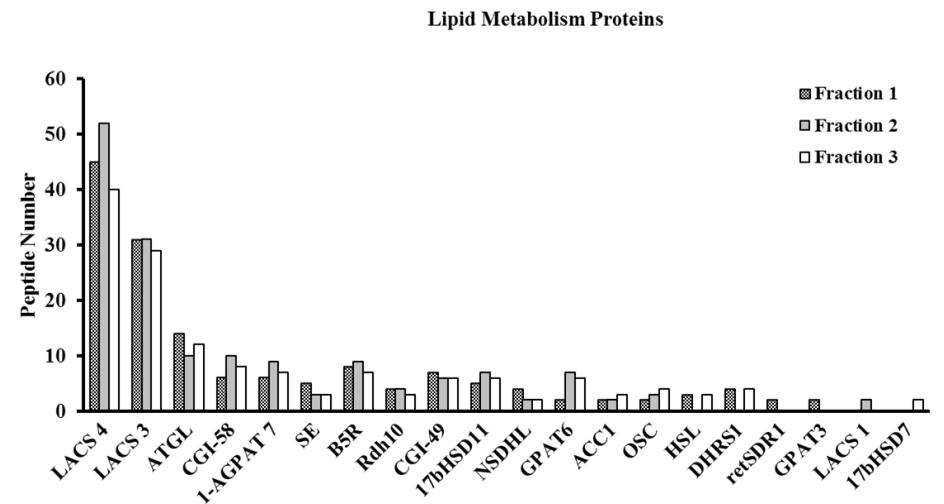

## Supplemental Reference

- 1 Zhang, H. *et al.* Proteome of skeletal muscle lipid droplet reveals association with mitochondria and apolipoprotein a-I. *J. Proteome Res.* **10**, 4757-4768 (2011).
